# Supplementary material
Source: publisher figshare collection journal article supplement (https://karger.figshare.com/ndownloader/files/35904653)
Supplement: Supplementary file 1 [file 35904653]

**Table S2. 15 hub genes with high connectivity from 3 key modules.**

| **Module** | **Gene** | **MM_R** | **MM_pvalue** | **GS_R** | **GS_pvalue** |
| --- | --- | --- | --- | --- | --- |
| **yellow** | GPX8 | 0.940181 | 1.13202E-22 | 0.484235 | 0.000563 |
| MEDAG | 0.931448 | 2.2142E-21 | 0.396295 | 0.005823 |
| ITGBL1 | 0.915265 | 2.19355E-19 | 0.375195 | 0.009359 |
| DCN | 0.910157 | 7.7503E-19 | 0.489843 | 0.000475 |
| SERPINF1 | 0.9072 | 1.55587E-18 | 0.423481 | 0.003017 |
| **blue** | MT3 | 0.891734 | 4.22E-17 | 0.538088 | 9.58E-05 |
| SOX15 | 0.891408 | 4.50E-17 | 0.360044 | 0.012924 |
| SOX1 | 0.889094 | 7.06E-17 | 0.375662 | 0.009265 |
| TROAP | 0.885007 | 1.52E-16 | 0.450748 | 0.001475 |
| YIF1B | 0.883751 | 1.92E-16 | 0.568578 | 3.05E-05 |
| **turquoise** | FERMT3 | 0.923832 | 2.18E-20 | 0.446364 | 0.001661 |
| NCF4 | 0.9211 | 4.69E-20 | 0.519537 | 0.000182 |
| CTSS | 0.917093 | 1.37E-19 | 0.384685 | 0.007588 |
| TLR8 | 0.914464 | 2.69E-19 | 0.370898 | 0.010272 |
| LAPTM5 | 0.911721 | 5.31E-19 | 0.278082 | 0.058409 |

Notes: GS: gene significance; MM: modular membership, obtained from the correlation between the module feature vector and the gene expression.
